# Supplementary material for: In silico immune infiltration profiling combined with functional enrichment analysis reveals a potential role for naïve B cells as a trigger for severe immune responses in the lungs of COVID-19 patients
Source: PubMed Central journal article supplement (PMC7710067; doi:10.1371/journal.pone.0242900), 2020-12-02
Supplement: pone.0242900.s001.pdf [file pone.0242900.s001.pdf]

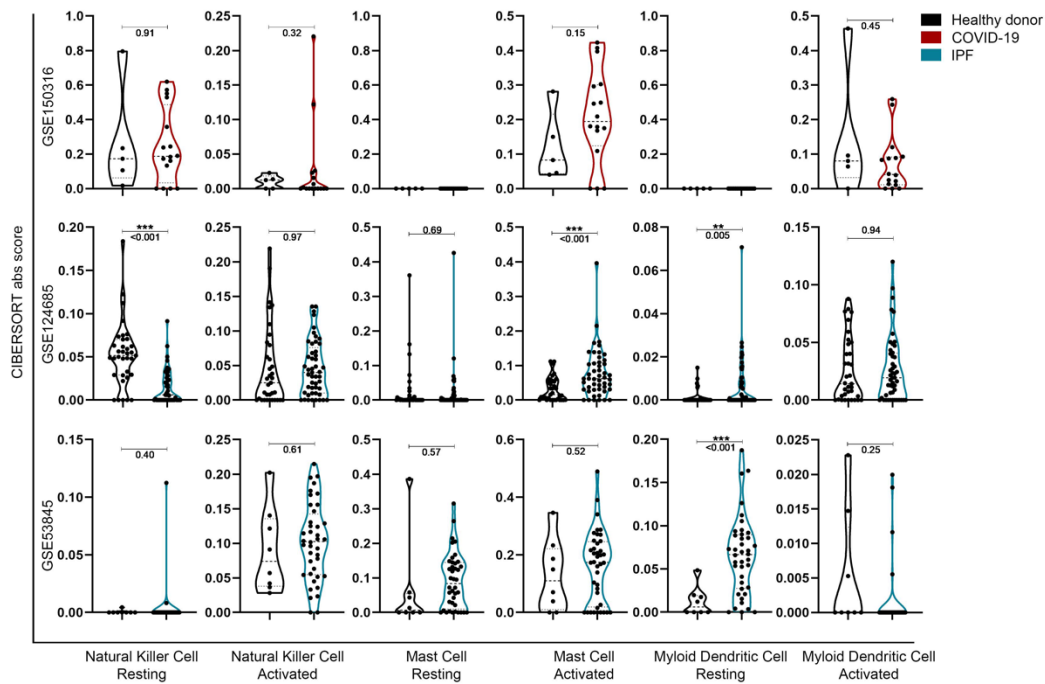

**Supplementary Figure 1 In silico simulated uncategorized immune cell infiltration in lung tissue between COVID-19 and IPF patients. \* $P<0.05$ , \*\* $P<0.01$  and \*\*\* $P<0.001$ , with comparisons indicated by brackets**

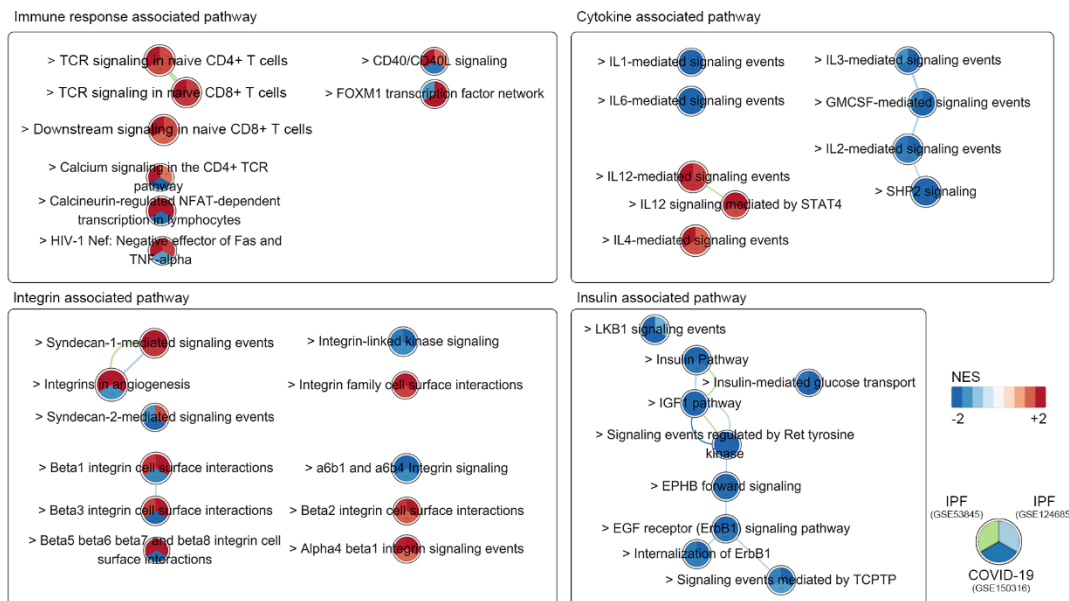

**Supplementary Figure 2 PID pathway functional enrichment map summary of GSEA in the lung tissues of COVID-19 and IPF patients. Commonality of positive or negative enrichments in the PID pathway gene sets after GSEA assessment using enrichment map visualization in COVID-19 and IPF. Color represents the NES of the gene set in the database as assessed by GSEA. Gene sets that are associated with immune responses or that have a high degree of consistency and overlap in enrichment**

are listed here. Criteria for enrichment significance screening:  $P$ -value  $<0.05$ , FDR  $<0.25$

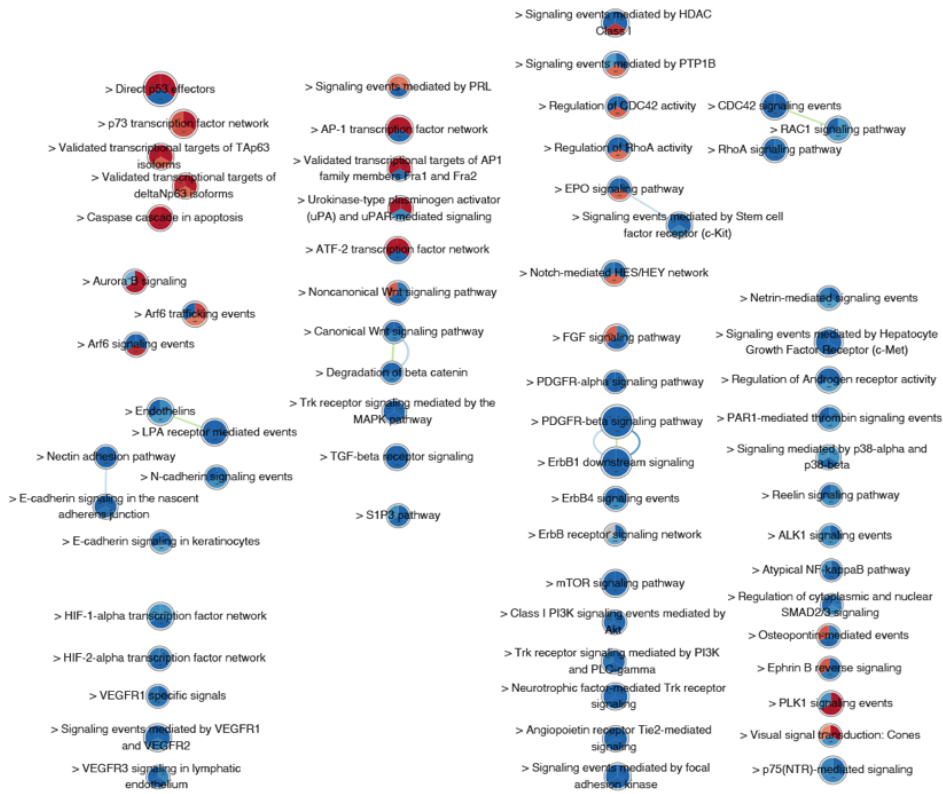

**Supplementary Figure 3 Uncategorized PID pathway functional enrichment map summary of GSEA in the lung tissues of COVID-19 and IPF patients.**
